# Supplementary material
Source: MDPI journal article supplement (https://www.mdpi.com/2071-1050/14/11/6389)
Supplement: s1 [file s1]

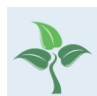

## Supplementary files

**Table S1.** Standard amounts of macronutrients for the juvenile unproductive phase fertilization of olive growing, according to the DIP of Apulia region, both for the integrated and organic management.

| Juvenile unproductive phase fertilization |    |
|-------------------------------------------|----|
| 1° year (kg/ha)                           |    |
| N                                         | 20 |
| P <sub>2</sub> O <sub>5</sub>             | 15 |
| K <sub>2</sub> O                          | 20 |
| 2° year (kg/ha)                           |    |
| N                                         | 30 |
| P <sub>2</sub> O <sub>5</sub>             | 25 |
| K <sub>2</sub> O                          | 40 |
| 3° year (kg/ha)                           |    |
| N                                         | 30 |
| P <sub>2</sub> O <sub>5</sub>             | 50 |
| K <sub>2</sub> O                          | 60 |
| 4° year (kg/ha)                           |    |
| N                                         | 60 |
| P <sub>2</sub> O <sub>5</sub>             | 50 |
| K <sub>2</sub> O                          | 60 |

**Table S2.** Standard amounts of macronutrients for the adult phase fertilization of olive growing, according to the DIP of Apulia region.

| Adult phase fertilization     |                             |                             |
|-------------------------------|-----------------------------|-----------------------------|
|                               | Integrated farming<br>(INT) | Organic farming<br>(BIO)    |
| N                             | 120                         | 120                         |
| Nitrogen fertilizer           | Urea                        | Pelleted organic fertilizer |
| P <sub>2</sub> O <sub>5</sub> | 50                          | 20                          |
| Phosphate fertilizer          | Superphosphate              | Pelleted organic fertilizer |
| K <sub>2</sub> O              | 120                         | 120                         |
| Potassium fertilizer          | Potassium sulphate          | Pelleted organic fertilizer |

**Table S3.** Control of the most common diseases, phytophagous and weed in Apulia region, both for INT and for BIO farming.

| Diseases control                    |                             |                          |
|-------------------------------------|-----------------------------|--------------------------|
|                                     | Integrated farming<br>(INT) | Organic farming<br>(BIO) |
| Spilocea oleagina                   |                             |                          |
| Mycocentrospora cladosporioides     |                             | Copper oxychlorides      |
| Pseudomonas syringae sp. Savastanoi |                             |                          |
| Number of treatments/yr             |                             | 3                        |
| Commercial product used             |                             | Ossiclor 35WG            |
| Single treatment amount (kg/ha)     |                             | 3                        |
| Total amount/yr                     |                             | 9                        |
| Phytophagous control                |                             |                          |
|                                     | Integrated farming<br>(INT) | Organic farming<br>(BIO) |
| Prays oleae                         | Dimethoate                  | Bacillus Thuringiensis   |
| Number of treatments/yr             |                             | 1                        |

|                                                  |                                   |                                     |
|--------------------------------------------------|-----------------------------------|-------------------------------------|
| Commercial product used                          | Rogor L40                         | Kristal 32 WG                       |
| Active ingredient quantity for each treatment/ha | 0.48 kg                           | 0.8 kg                              |
| <i>Bactrocera oleae</i>                          | Dimethoate + Acetamiprid          | Spintorfly                          |
| Number of treatments/yr                          | 1 + 1                             | 5                                   |
| Commercial product used                          | Rogor L40 + Epik SL               | Spinosad                            |
| Active ingredient quantity for each treatment/ha | 0,48 + 0,1 g                      | 0,24 g                              |
| <i>Saissetia oleae</i>                           | Summery mineral oil + Fosmet      | Summery mineral oil                 |
| Number of treatments/yr                          | 1 + 1                             | 2                                   |
| Commercial product used                          | Oliocin + Suprafos EC             | Oliocin                             |
| Active ingredient quantity for each treatment/ha | 1,39 kg + 0,75 kg                 | 1,39 kg                             |
| <i>Palpita unionalis</i>                         | Bacillus Thuringiensis            | Bacillus Thuringiensis              |
| Number of treatments/yr                          | 1                                 | 1                                   |
| Commercial product used                          | Kristal 32WG                      | Kristal 32WG                        |
| Active ingredient quantity for each treatment/ha | 0.8 kg                            | 0.8 kg                              |
| <b>Weed control</b>                              |                                   |                                     |
|                                                  | <b>Chemical weeding<br/>(INT)</b> | <b>Mechanical weeding<br/>(BIO)</b> |
| Number of treatments (or soil tillage)/yr        | 2                                 | 3 o 4                               |
| Commercial product used/machinery                | Glyphosate                        | Harrow                              |
| Active ingredient amount for each treatment/ha   | 0.72 kg                           | /                                   |
